# Supplementary material for: Obesity and Uncontrolled Diabetes Predict Depression in HF Patients
Source: MDPI journal article supplement (doi:10.3390/jcm10235663), 2021-11-30
Supplement: s1 [file s1]

## SUPPLEMENTARY DATA:

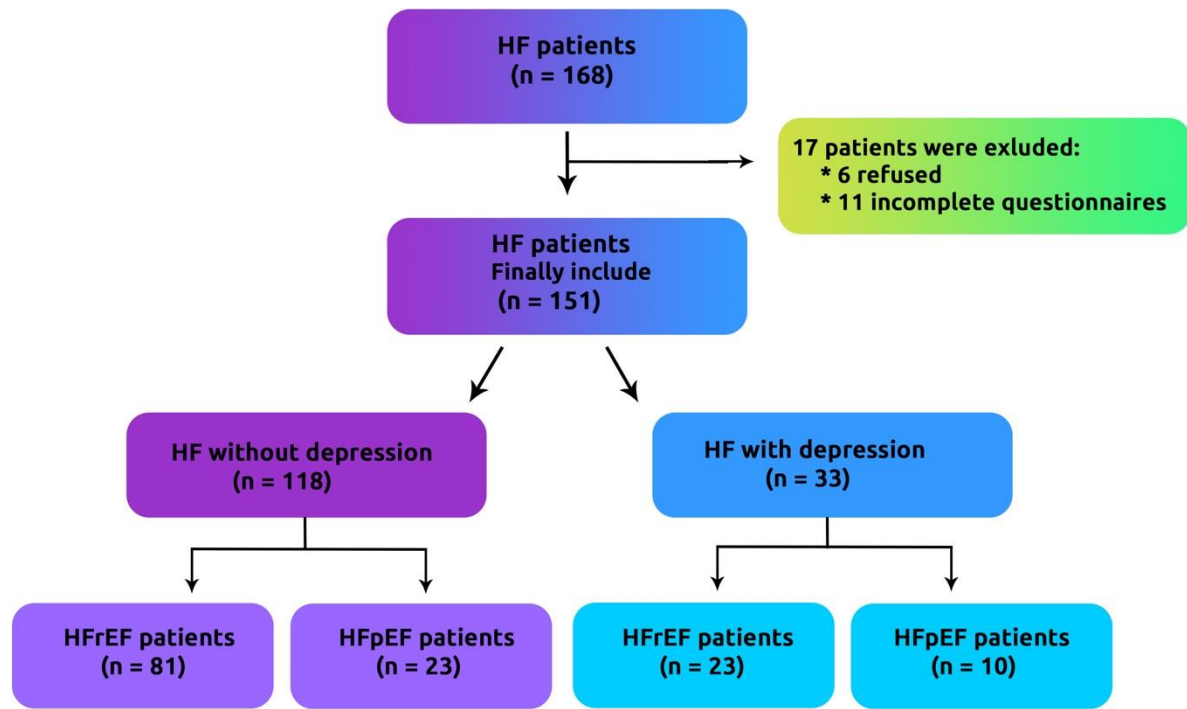

**Figure S1.** Flow chart of participants

**Table S1.** Demographic, and clinical data between HF patients with and without depression.

| Variable                 | HF patients<br>(n = 151) | HF without depression<br>(n = 118) | HF with depression<br>(n=33) | P value |
|--------------------------|--------------------------|------------------------------------|------------------------------|---------|
| <i>Clinical indices</i>  |                          |                                    |                              |         |
| Age                      | 66.6 ± 11                | 61.6 ± 11                          | 71.5 ± 10                    | 0.01    |
| Sex (female, %)          | 79 (52.3)                | 59 (50)                            | 20 (60.6)                    | 0.02    |
| Smoking (n, %)           | 29 (19.2)                | 22 (18.6)                          | 7 (21.2)                     | 0.14    |
| BMI (m/kg <sup>2</sup> ) | 28.2 ± 4.7               | 27.3 ± 3.8                         | 29.0 ± 5.7                   | 0.04    |
| Underweight (n, %)       | 1 (0.66)                 | 1 (0.85)                           | 0 (0)                        | 0.09    |
| Normal weight (n, %)     | 57 (37.8)                | 42 (35.6)                          | 15 (42.4)                    | 0.03    |
| Overweight (n, %)        | 59 (39.1)                | 44 (38.1)                          | 15 (38.6)                    | 0.34    |
| Obese (n, %)             | 43 (28.5)                | 31 (26.3)                          | 12 (36.4)                    | 0.02    |
| SBP (mmHg)               | 107.5 ± 16               | 110 ± 17                           | 105 ± 14                     | 0.33    |
| DBP (mmHg)               | 79.5 ± 11                | 80 ± 12                            | 79 ± 10                      | 0.62    |
| HR (beats/min)           | 76 ± 14                  | 74 ± 15                            | 78 ± 13                      | 0.21    |
| NYHA class               | 2.3 ± 1.0                | 1.9 ± 0.9                          | 2.8 ± 1.1                    | 0.01    |
| <i>Comorbidities</i>     |                          |                                    |                              |         |
| AH (n, %)                | 100 (66.2)               | 80 (67.8)                          | 20 (60.6)                    | 0.10    |
| DM (n, %)                | 73 (48.4)                | 55 (46.6)                          | 18 (54.5)                    | 0.02    |
| Dyslipidemia             | 43 (28.5)                | 33 (27.9)                          | 10 (30.3)                    | 0.61    |

|                        |            |           |           |      |
|------------------------|------------|-----------|-----------|------|
| CHD (n, %)             | 66 (43.8)  | 50 (42.4) | 16 (48.4) | 0.52 |
| AF (n, %)              | 71 (47.1)  | 52 (44.1) | 19 (57.6) | 0.01 |
| <b>Drugs</b>           |            |           |           |      |
| Aspirin (n, %)         | 118 (78.2) | 92 (77.9) | 26 (78.8) | 0.77 |
| ACE/ARBs (n, %)        | 125 (82.8) | 97 (82.2) | 28 (84.8) | 0.45 |
| Diuretics (n, %)       | 107 (70.9) | 80 (67.8) | 27 (81.8) | 0.01 |
| BB (n, %)              | 111 (73.5) | 85 (72.1) | 26 (78.8) | 0.12 |
| CCB (n, %)             | 23 (15.2)  | 18 (15.2) | 5 (15.2)  | 0.88 |
| Antiarrhythmic (n, %)  | 29 (19.2)  | 22 (18.6) | 7 (21.2)  | 0.33 |
| Anticoagulation (n, %) | 27 (17.9)  | 19 (16.1) | 8 (24.2)  | 0.04 |
| Statins (n, %)         | 38 (25.2)  | 30 (25.4) | 8 (24.2)  | 0.27 |

*AH: arterial hypertension; ACEi: Angiotensin-converting enzyme inhibitors; ARBs: Angiotensin II Receptor Blockers; AF: Atrial fibrillation; BB: Beta blockers; BMI: Body mass index; CCB: Calcium channels blockers; CHD: Coronary heart disease; COPD: Chronic obstructive pulmonary disease; DM: diabetes mellitus; HR: Heart rate; SBD: Systolic blood pressure; DBP: Diastolic blood pressure.*

**Table S2.** Laboratory data between HF patients with and without depression.

| Variable                                     | HF patients<br>(n = 151) | HF without depression<br>(n = 118) | HF with depression<br>(n=33) | P value |
|----------------------------------------------|--------------------------|------------------------------------|------------------------------|---------|
| <b>Laboratory</b>                            |                          |                                    |                              |         |
| Glucose (mmol/L)                             | 6.9 ± 2.2                | 5.6 ± 1.2                          | 8.2 ± 3.2                    | 0.02    |
| Urea (mmol/L)                                | 15.5 ± 5.2               | 13 ± 4.2                           | 18 ± 6.1                     | 0.004   |
| Creatinine (umol/L)                          | 134 ± 15                 | 122 ± 11                           | 145 ± 19                     | 0.01    |
| Bilirubin (mg/dL)                            | 3.8 ± 1.2                | 3.5 ± 1.1                          | 4.1 ± 1.3                    | 0.11    |
| ALT (U/L)                                    | 31 ± 10                  | 33 ± 11                            | 29 ± 10                      | 0.22    |
| AST (U/L)                                    | 38 ± 10                  | 29 ± 10                            | 27 ± 10                      | 0.41    |
| Albumin (g/L)                                | 30.5 ± 8.5               | 32 ± 8                             | 29 ± 9                       | 0.22    |
| Protein (g/L)                                | 62 ± 11                  | 63 ± 10                            | 60 ± 11                      | 0.14    |
| Cholesterol (mmol/L)                         | 6.7 ± 3.4                | 6.5 ± 3.7                          | 6.9 ± 3.1                    | 0.28    |
| Triglyceride (mmol/L)                        | 2.1 ± 0.8                | 1.9 ± 0.8                          | 2.2 ± 0.9                    | 0.21    |
| WBC (10 <sup>3</sup> /mm <sup>3</sup> )      | 11.4 ± 4.3               | 11.2 ± 4.6                         | 11.6 ± 3.2                   | 0.27    |
| RBC (10 <sup>6</sup> /mm <sup>3</sup> )      | 4.5 ± 1.2                | 4.8 ± 1.2                          | 4.1 ± 1.1                    | 0.33    |
| Platelet (10 <sup>3</sup> /mm <sup>3</sup> ) | 210 ± 23                 | 213 ± 21                           | 208 ± 25                     | 0.11    |
| Iron (umol/L)                                | 9.5 ± 2.8                | 13 ± 3.1                           | 8 ± 2.5                      | 0.03    |

*ALT; Alanine aminotransferase; AST: Aspartate aminotransferase; RBC: red blood cell; WBC: white blood cell.*

**Table S3.** Echocardiographic data between HF patients with and without depression

| Variable    | HF patients<br>(n = 151) | HF without depression<br>(n = 118) | HF with depression<br>(n=33) | P value |
|-------------|--------------------------|------------------------------------|------------------------------|---------|
| LV EDD (cm) | 5.1 ± 0.4                | 5.2 ± 0.4                          | 5.9 ± 0.6                    | 0.03    |
| LV ESD (cm) | 3.6 ± 0.4                | 3.6 ± 0.4                          | 4.3 ± 0.5                    | 0.02    |
| IVSd (cm)   | 1.15 ± 0.1               | 1.1 ± 0.1                          | 1.2 ± 0.2                    | 0.40    |

|                  |           |           |           |      |
|------------------|-----------|-----------|-----------|------|
| LVPWd (cm)       | 1.1 ± 0.2 | 1.0 ± 0.1 | 1.1 ± 0.2 | 0.21 |
| LV EF (%)        | 47 ± 7.8  | 55 ± 8.1  | 39 ± 7.5  | 0.01 |
| LA diameter (cm) | 4.5 ± 4.7 | 4.1 ± 3.9 | 4.8 ± 5.6 | 0.03 |
| RA diameter (cm) | 3.5 ± 1.4 | 3.4 ± 1.6 | 3.6 ± 1.3 | 0.13 |
| RV diameter (cm) | 3.4 ± 1.2 | 3.3 ± 1.1 | 3.5 ± 1.3 | 0.31 |

*LV: left ventricle; EDD: end-diastolic dimension; ESD: end-systolic dimension; IVSd: inter-ventricular septum in diastole; PWd: parietal wall in diastole; EF: Ejection fraction; LA: left atrial; RA: Right atrium; RV: Right ventricle;*
